# Supplementary material
Source: PubMed Central journal article supplement (PMC3675958)
Supplement: AEM.00564-13_zam999104458so1.pdf [file AEM.00564-13_zam999104458so1.pdf]

**TABLE S1.** Sequences of primers used for saturation mutagenesis at position A479.

| Primer name        | Sequence (5' - 3')          |
|--------------------|-----------------------------|
| A479X <sup>a</sup> | GGCCACAT <u>CGCC</u> GGCTCG |
| A479rev            | GGATGCGCCCAGGACAAAGC        |

<sup>a</sup> X indicates the 19 amino acid residues other than the original one. The substitution codon for Ala479 (GCC) is underlined. Codons used for substitution were: Cys (TGC), Asp (GAT), Glu (GAA), Phe (TTC), Gly (GGC), His (CAT), Ile (ATT), Lys (AAA), Leu (CTG), Met (ATG), Asn (AAC), Pro (CCG), Gln (CAG), Arg (CGC), Ser (AGC), Thr (ACC), Val (GTG), Trp (TGG), and Tyr (TAT).

**TABLE S2.** *In vivo* activities of wild-type and A479X mutants of PhaC<sub>CS</sub>.

| PHA synthase <sup>a</sup> | PHA content (wt%) <sup>b</sup> |
|---------------------------|--------------------------------|
| Wild-type                 | 35.6 ± 2.9                     |
| A479C                     | 19.0 ± 6.9                     |
| A479D                     | 27.4 ± 3.4                     |
| A479E                     | 3.5 ± 1.8                      |
| A479F                     | 0.3 ± 0.1                      |
| A479G                     | 58.2 ± 2.8                     |
| A479H                     | 39.2 ± 1.7                     |
| A479I                     | 28.4 ± 2.8                     |
| A479K                     | 0.4 ± 0.1                      |
| A479L                     | 0.7 ± 0.3                      |
| A479M                     | 46.5 ± 5.2                     |
| A479N                     | 0.9 ± 0.1                      |
| A479P                     | 27.4 ± 3.2                     |
| A479Q                     | 36.2 ± 5.1                     |
| A479R                     | 0.7 ± 0.1                      |
| A479S                     | 32.4 ± 4.4                     |
| A479T                     | 36.6 ± 5.4                     |
| A479V                     | 44.6 ± 5.5                     |
| A479W                     | 49.1 ± 3.2                     |
| A479Y                     | 32.1 ± 3.1                     |

<sup>a</sup> Crude extract from *E. coli* LS5218 transformants harboring wild-type and individual A479 mutant PhaC<sub>CS</sub> grown on LB medium containing 100 µg/mL of ampicillin and 50 µg/mL of kanamycin for 9 h at 30 °C

<sup>b</sup> Determined via gas chromatography from freeze-dried cells

**TABLE S3.** Thermal properties of P(3HB) and P(3HB-*co*-3HHx) synthesized by *E. coli* LS5218 transformants harboring wild-type and various A479X mutant PhaC<sub>S</sub><sup>a</sup>.

| PHA synthase | Polymer                          | $T_g$ (°C) <sup>b</sup> | $T_m$ (°C) <sup>c</sup> | $\Delta H_m$ (J/g) <sup>d</sup> |
|--------------|----------------------------------|-------------------------|-------------------------|---------------------------------|
| Wild-type    | P(3HB- <i>co</i> -1.6 mol% 3HHx) | 8                       | 162                     | 65                              |
| A479E        | P(3HB)                           | 7                       | 172                     | 80                              |
| A479S        | P(3HB- <i>co</i> -6.6 mol% 3HHx) | -4                      | 154                     | 40                              |
| A479T        | P(3HB- <i>co</i> -4.4 mol% 3HHx) | -4                      | 162                     | 44                              |
| A479V        | P(3HB- <i>co</i> -2.0 mol% 3HHx) | -2                      | 163                     | 52                              |
| A479W        | P(3HB- <i>co</i> -0.8 mol% 3HHx) | 3                       | 165                     | 68                              |

<sup>a</sup> Cells were cultivated in 100 mL of M9 medium containing 0.25 % (w/v) dodecanoic acid, 0.4 % (v/v) Brij-35, 100  $\mu$ g/mL of ampicillin and 50  $\mu$ g/mL of kanamycin for 72 h at 30 °C

<sup>b</sup> Glass transition temperature

<sup>c</sup> Melting temperature

<sup>d</sup> Enthalpy of fusion

A

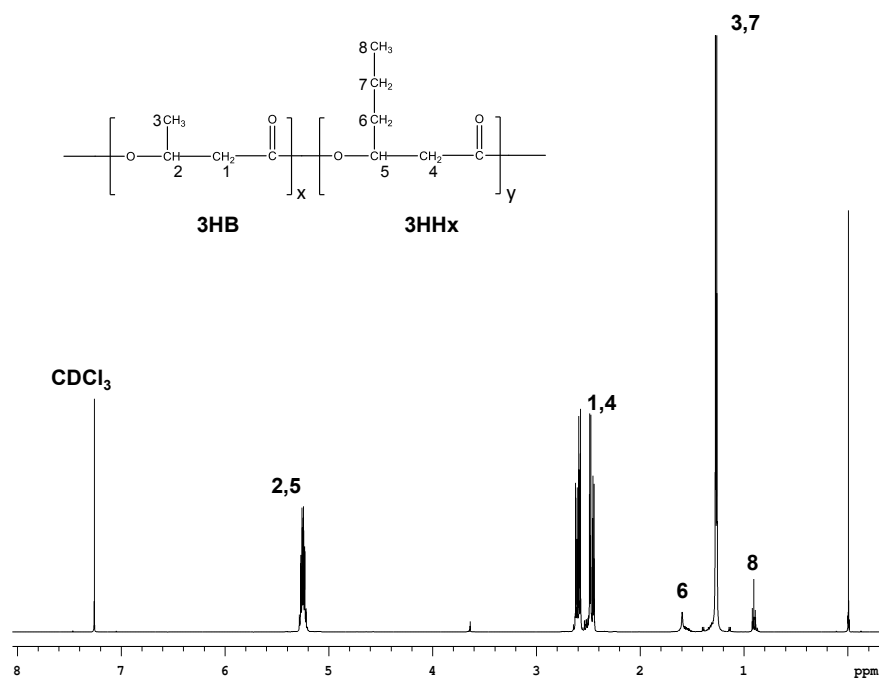

B

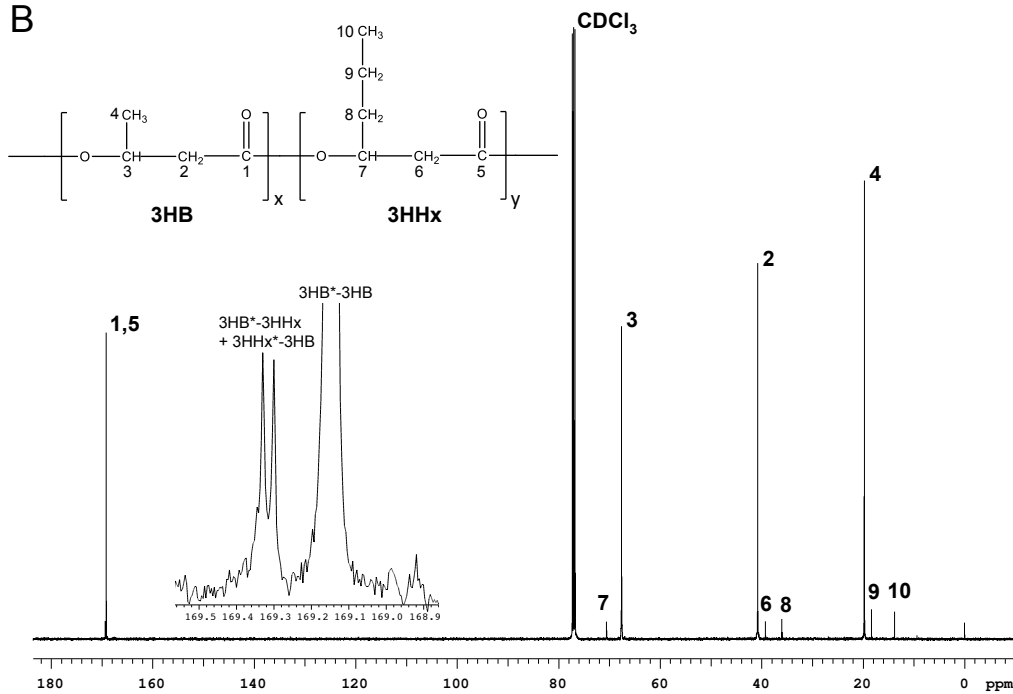

**FIG S1.** (A)  $^1\text{H-NMR}$  and (B)  $^{13}\text{C-NMR}$  spectra of P(3HB-co-6.6 mol% 3HHx) produced by *E. coli* LS5218 transformant harboring A479S mutant PhaC<sub>S</sub>.
